# Supplementary material
Source: publisher figshare collection journal article supplement (https://tandf.figshare.com/ndownloader/files/15158300)
Supplement: Supplementary file 1 [file 15158300]

## SUPPLEMENTARY APPENDIX

This appendix has been provided by the authors to give readers additional information about their work.

Supplement to:

**Genetic dissection of two fiber yield-related stem traits in ramie (*Boehmeria nivea* L. Gaud)**

Fu Li, Zheng Zeng, Langbo Yi, Qingming Tang and Qingzhong Peng

Biotechnol. Biotechnol. Equip. 2019, **33**

Table S1 Primers for amplifying gene and its promoter.

| Gene                        | Length amplified |         | Sequences (5'-3')            | <i>T<sub>m</sub></i> (°C) |
|-----------------------------|------------------|---------|------------------------------|---------------------------|
| <i>whole_GLEAN_10018840</i> | 1764 bp          | Forward | ATGTTCTCTTCGGAGGATTTTG       | 59.6                      |
|                             |                  | Reverse | CTAAAGGAACTTCAAATAGAAATAGACT | 58.6                      |
| <i>whole_GLEAN_10018848</i> | 1704 bp          | Forward | ATGGAAGAACTAAATTCTCTTAATGG   | 57.6                      |
|                             |                  | Reverse | CTAGTTTTACGGAATTTC           | 54.0                      |
| <i>whole_GLEAN_10018850</i> | 1809 bp          | Forward | ATGAGCTTCCCTTTTGAGCT         | 58.1                      |
|                             |                  | Reverse | TTAATTAAGAAATCTCCAAGCAG      | 54.9                      |

*T<sub>m</sub>*, melting temperature
